# Supplementary material
Source: HighWire-hosted journal article supplement (https://ajnr-sso.highwirestaging.com/highwire/filestream/690/field_highwire_adjunct_files/0/16-00633.pdf)
Supplement: 16-00633.pdf [file 16-00633.pdf]

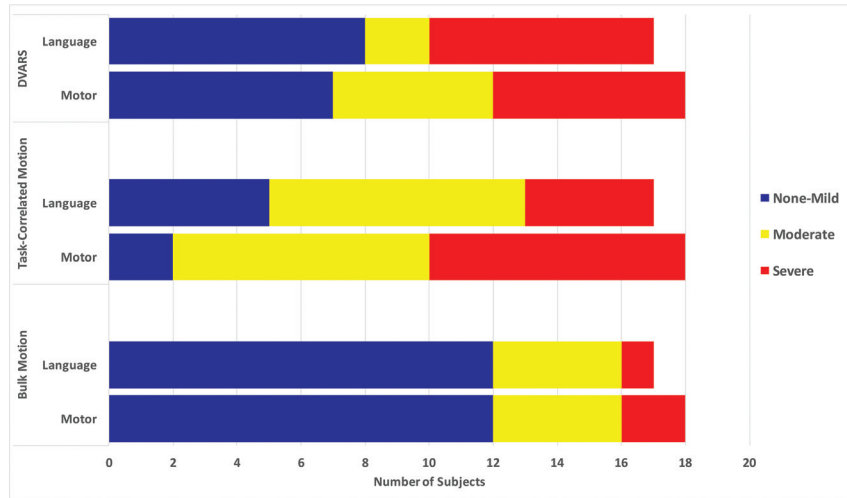

**ON-LINE FIG 1.** Distribution of motion parameters with respect to the type of fMRI task (language versus motor).

**On-line Table 1: Description of administered fMRI tasks**

| Task                | No. Times Performed | Block Length (sec) | Task Block                                                                           | Control Block                                                                      | No. Task Blocks | No. Control Blocks | Total Scan Length (min) |
|---------------------|---------------------|--------------------|--------------------------------------------------------------------------------------|------------------------------------------------------------------------------------|-----------------|--------------------|-------------------------|
| Foot motor          | 4                   | 20                 | Bilateral repetitive flexion of toes/forefoot                                        | Rest                                                                               | 6               | 6                  | 4                       |
| Finger motor        | 6                   | 20                 | Bilateral alternating finger tapping                                                 | Rest                                                                               | 6               | 6                  | 4                       |
| Tongue motor        | 2                   | 20                 | Repetitive lateral motion of tongue                                                  | Rest                                                                               | 6               | 6                  | 4                       |
| Face motor          | 6                   | 20                 | Repetitive lip pursing                                                               | Rest                                                                               | 6               | 6                  | 4                       |
| Picture naming      | 3                   | 20                 | Covert naming of picture (Boston Naming Test)                                        | Visually attend to abstract shapes                                                 | 6               | 6                  | 4                       |
| Semantic decision   | 6                   | 20                 | Press button if 2 simultaneously presented words are semantically related in any way | Press button if 2 simultaneously presented lines of nonalphabetic characters match | 6               | 6                  | 4                       |
| Sentence completion | 3                   | 20                 | Covertly fill in blank in a presented sentence                                       | Visually attend to nonalphabetic characters presented in sentence structure        | 6               | 6                  | 4                       |
| Word generation     | 5                   | 20                 | Covertly generate as many words as possible beginning with presented letter          | Visually attend to nonalphabetic character                                         | 6               | 6                  | 4                       |

**On-line Table 2: Detailed information of the specific discrepancies for all 14 disagreements between the 2 primary readers<sup>a</sup>**

| Specific Discrepancy between Readers                       | Subject No. | Paradigm                 | Reader 1 (Y/N) | Reader 2 (Y/N) | Reader 3 (Y/N) |
|------------------------------------------------------------|-------------|--------------------------|----------------|----------------|----------------|
| ICA vs realignment alone, reduced false-positives          | 2           | Semantic decision        | N              | Y              | Y              |
| ICA vs realignment alone, reduced false-positives          | 3           | Finger motor             | N              | Y              | N              |
| ICA vs realignment alone, new real areas of activation     | 3           | Word generation          | N              | Y              | Y              |
| ICA vs realignment alone, new real areas of activation     | 3           | Word generation (repeat) | N              | Y              | Y              |
| ICA vs motion scrubbing, new real areas of activation      | 3           | Word generation          | N              | Y              | Y              |
| ICA vs motion scrubbing, new real areas of activation      | 3           | Word generation (repeat) | N              | Y              | Y              |
| ICA vs realignment alone, new real areas of activation     | 5           | Finger motor             | Y              | N              | Y              |
| ICA vs motion scrubbing, new real areas of activation      | 5           | Finger motor             | Y              | N              | Y              |
| Realignment alone, diagnostic scan                         | 5           | Finger motor             | N              | Y              | N              |
| Motion scrubbing, diagnostic scan                          | 5           | Finger motor             | N              | Y              | N              |
| ICA vs realignment alone, reduced false-positives          | 6           | Semantic decision        | Y              | N              | Y              |
| Motion scrubbing vs realignment alone, improved statistics | 6           | Word generation          | Y              | N              | N              |
| Realignment alone, diagnostic scan                         | 7           | Sentence completion      | N              | Y              | N              |
| Motion scrubbing, diagnostic scan                          | 7           | Sentence completion      | N              | Y              | N              |

**Note:**—Y indicates yes; N, no.

<sup>a</sup> The distribution of subjects and specific paradigms and the point of disagreement are listed. Last, the decision by the third reader is included.
